# Supplementary material for: Chiral peptide nucleic acid monomers (PNAM) with modified backbones
Source: Royal Society of Chemistry journal article supplement (doi:10.1039/b806141f), 2008-01-01

# Preparation of Chiral Peptide Nucleic Acid Monomers (PNAM) with Modified Backbones

*Alan R. Katritzky,\* Tamari Narindoshvili*

Center for Heterocyclic Compounds, Department of Chemistry,

University of Florida, Gainesville, Florida 32611-7200

[katritzky@chem.ufl.edu](mailto:katritzky@chem.ufl.edu)

## **Supporting Information**

### **Table of content**

1. Copies of  $^1\text{H}$ ,  $^{13}\text{C}$  NMR spectra of **20-23**, **.22'**, **23'**, **27-29**, **32**, **33**.....S2

NMR spectra

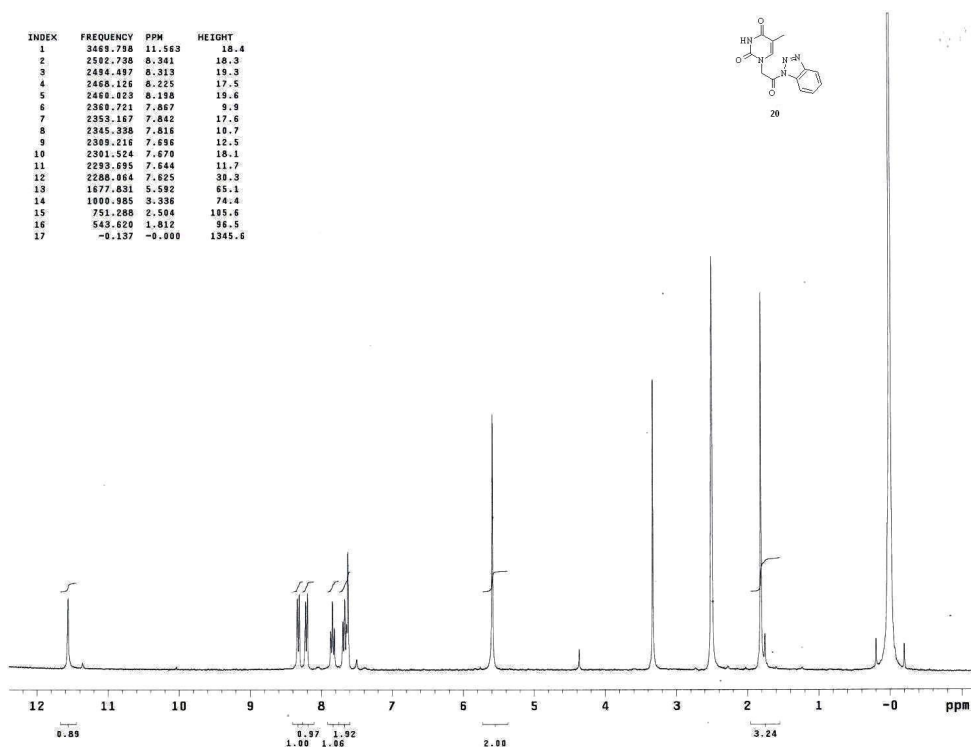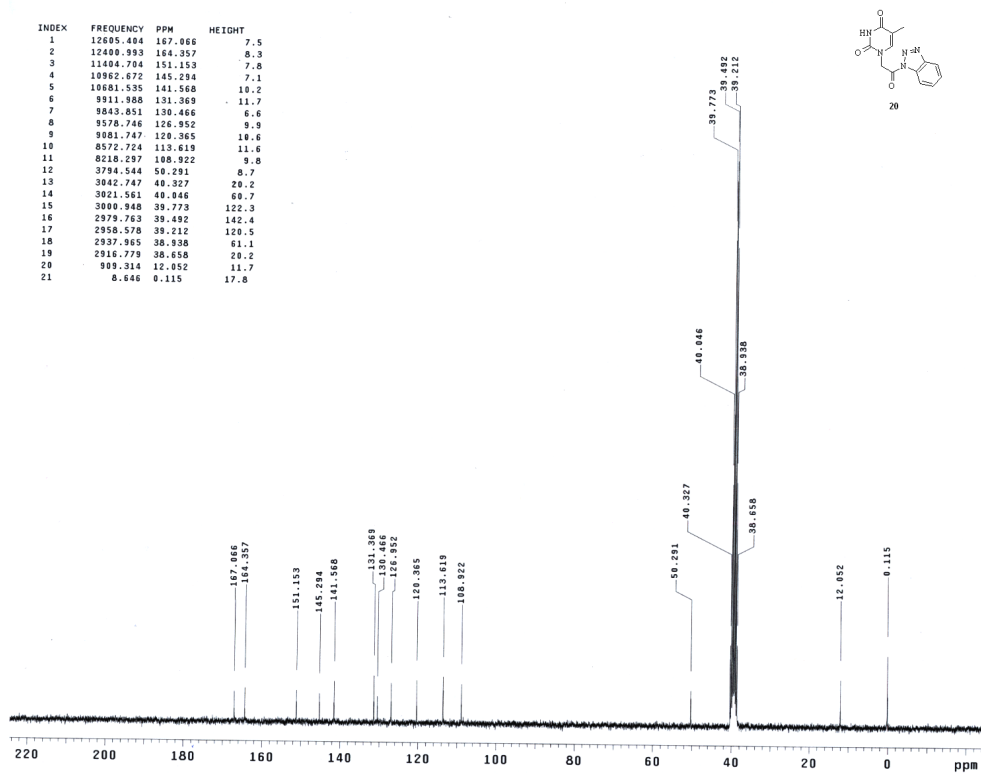

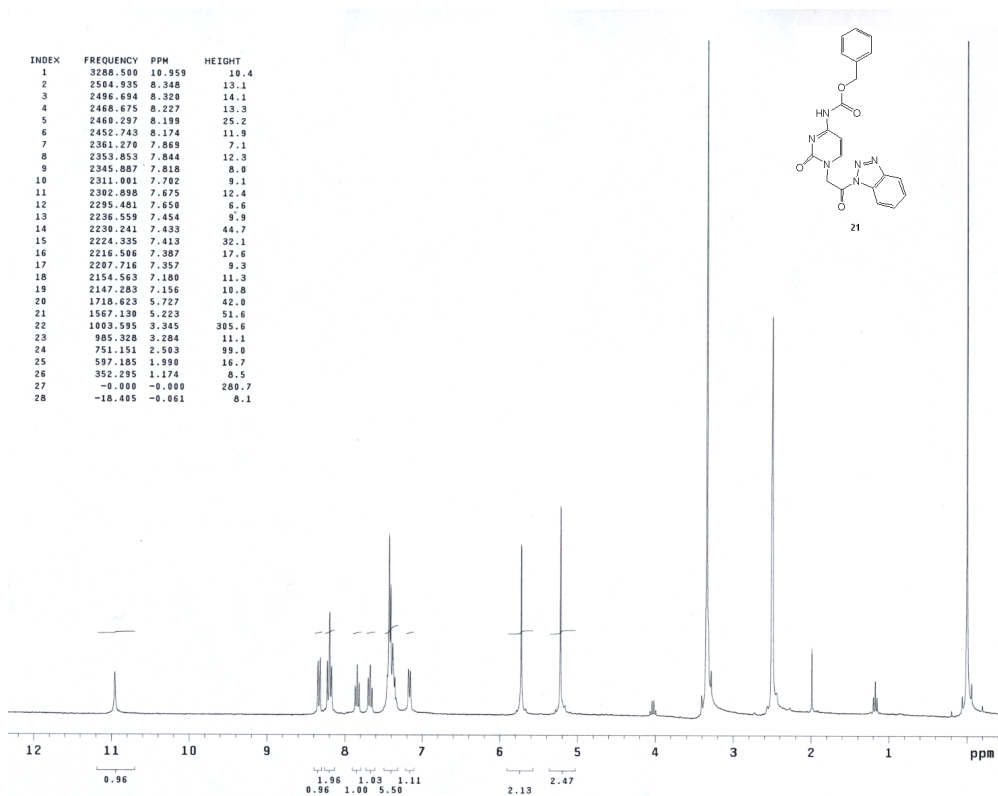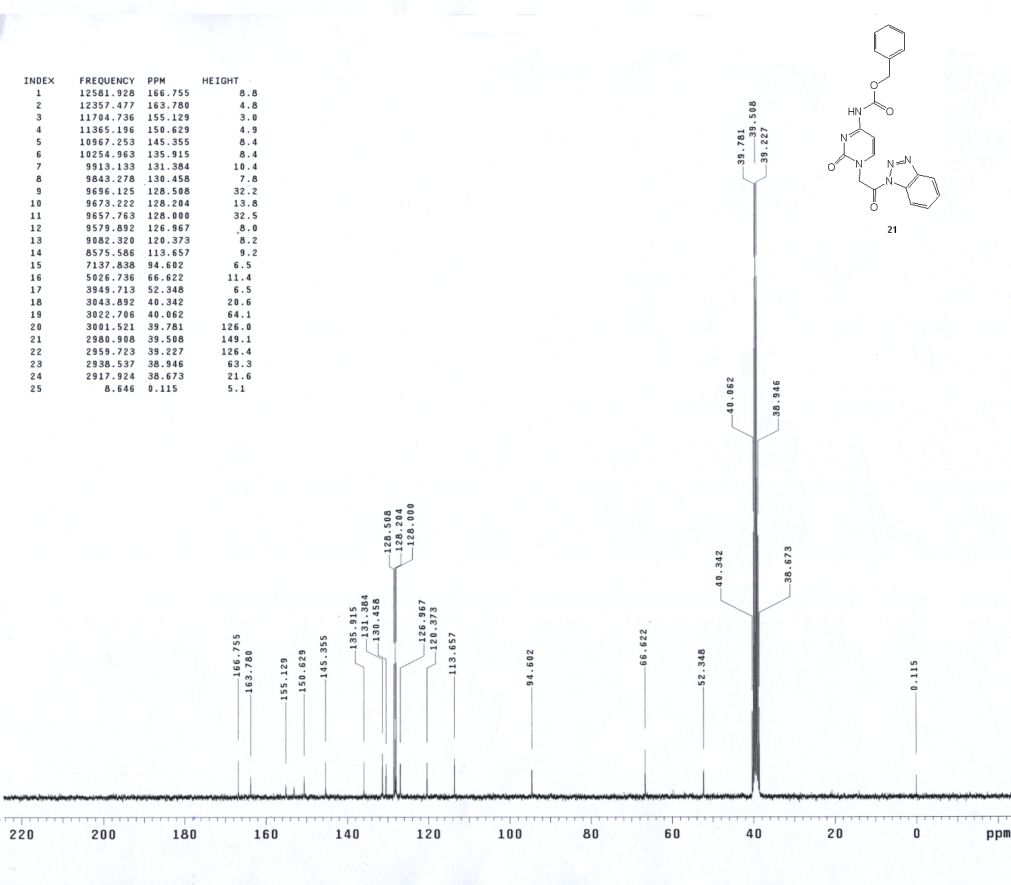

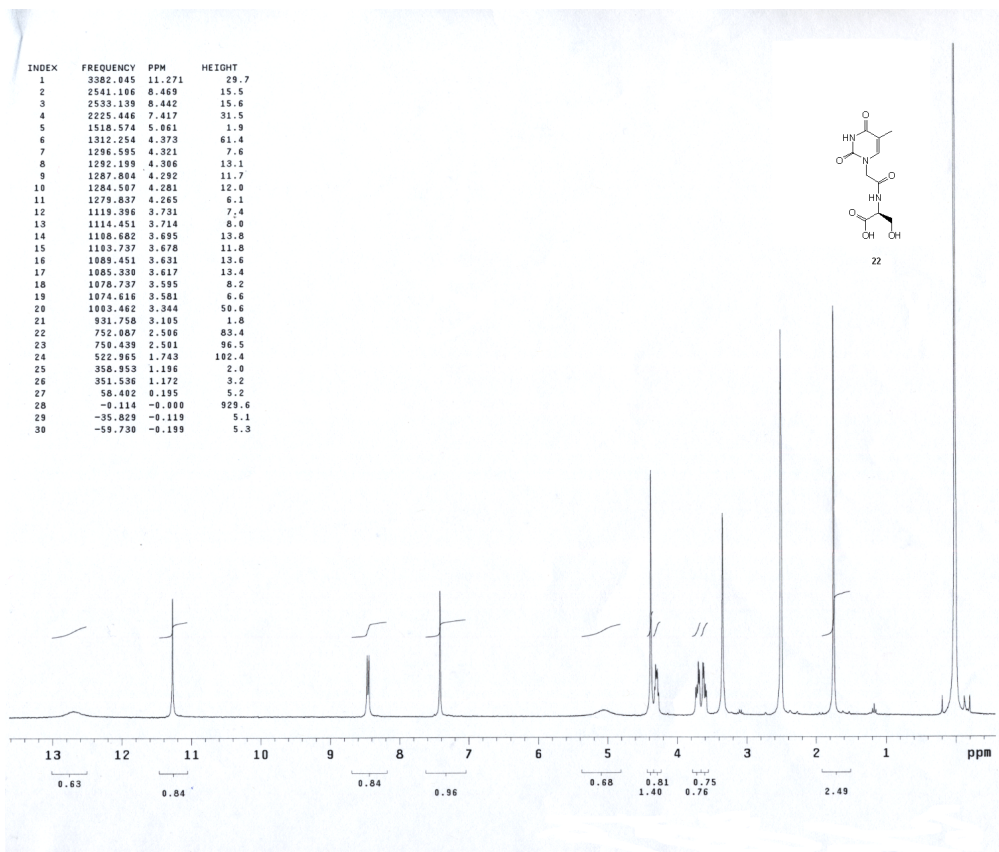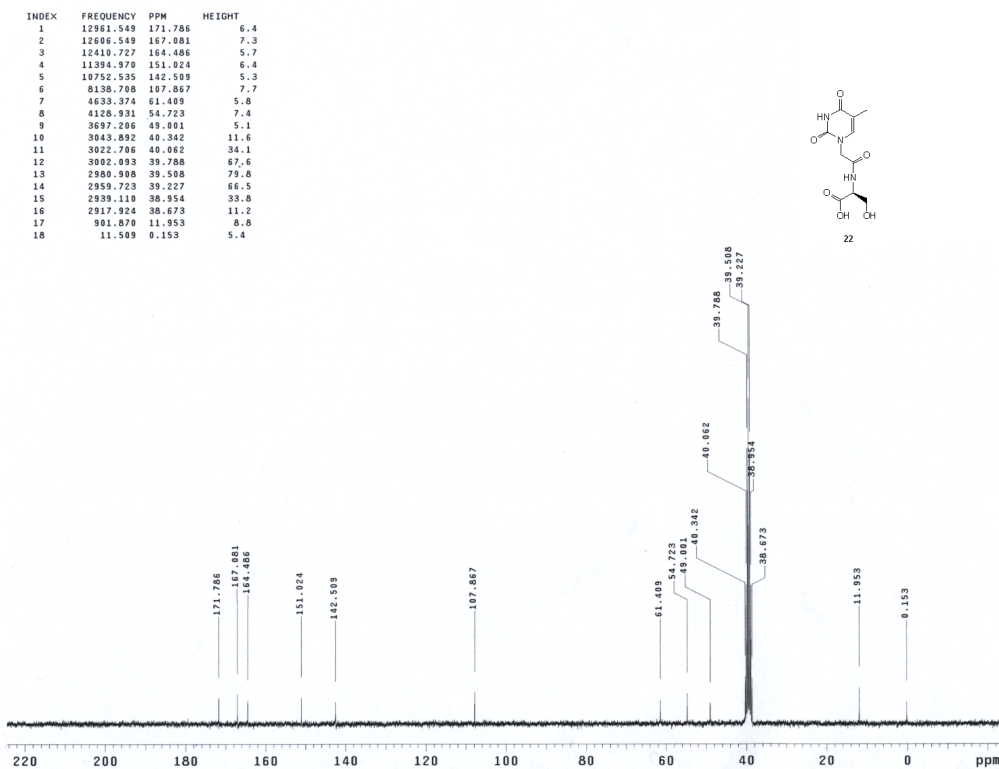

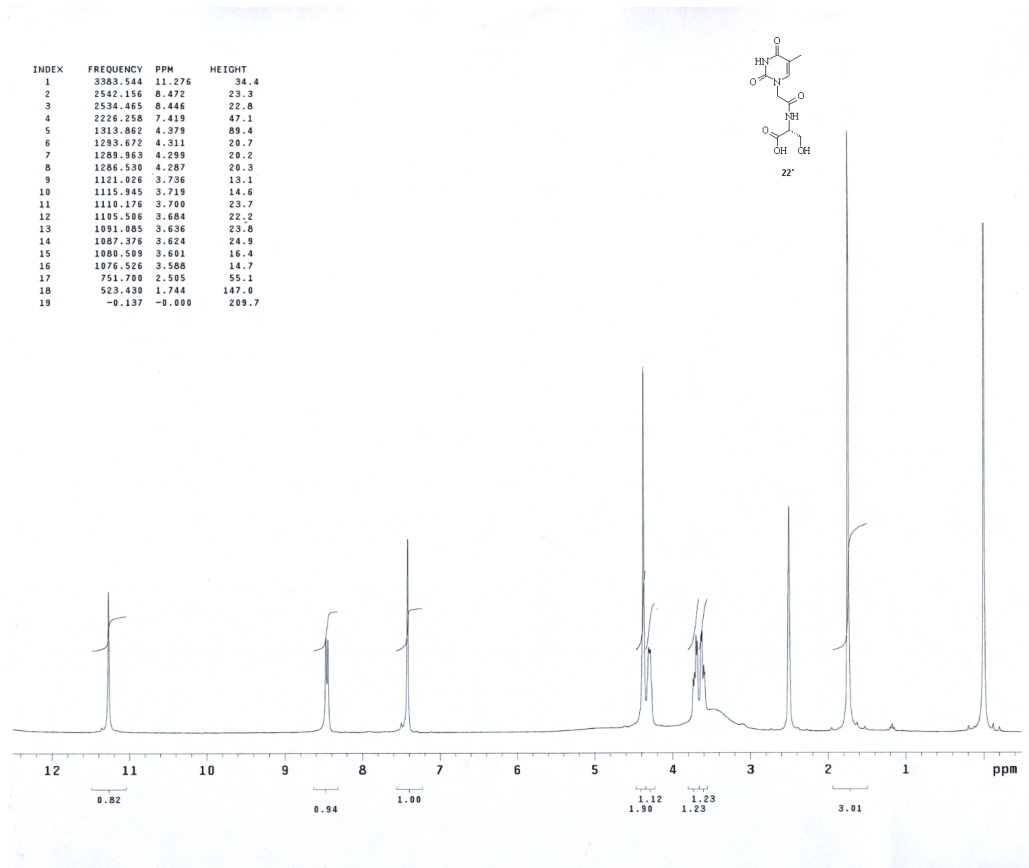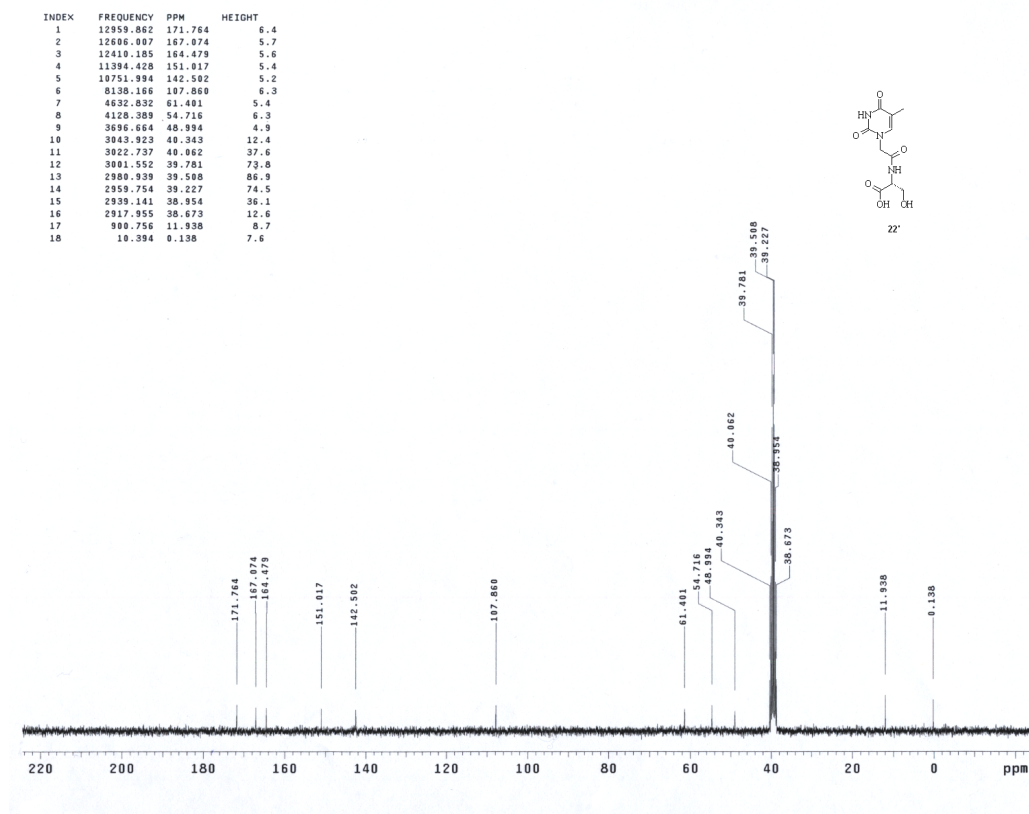

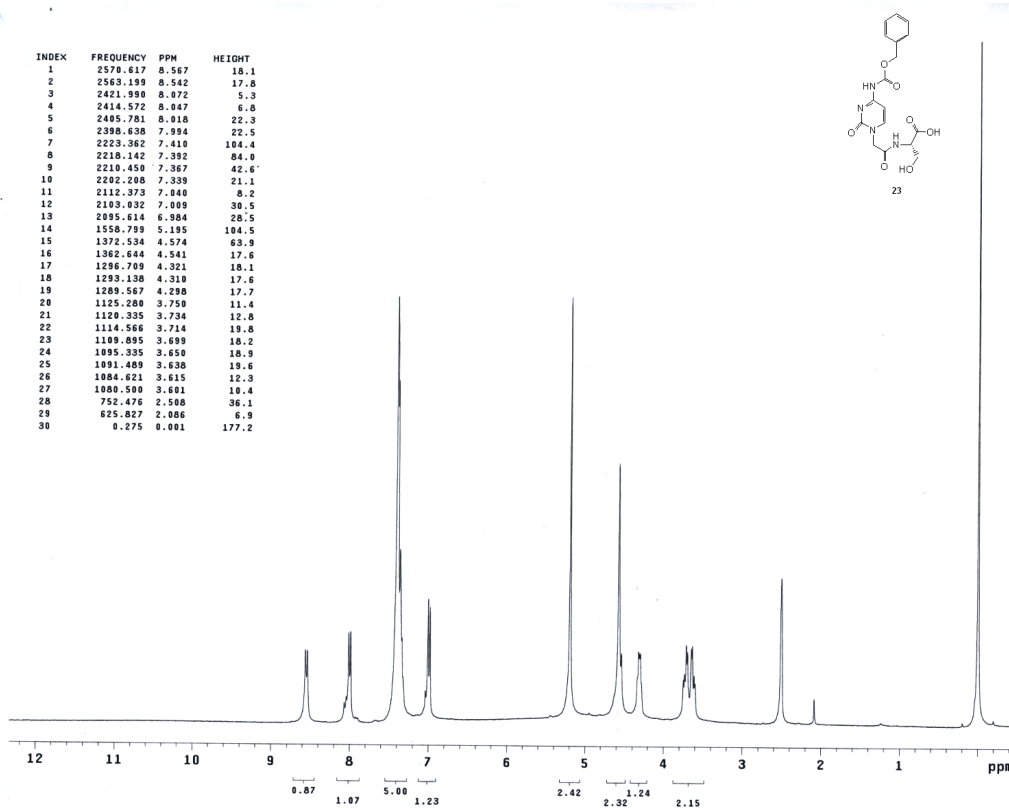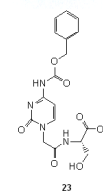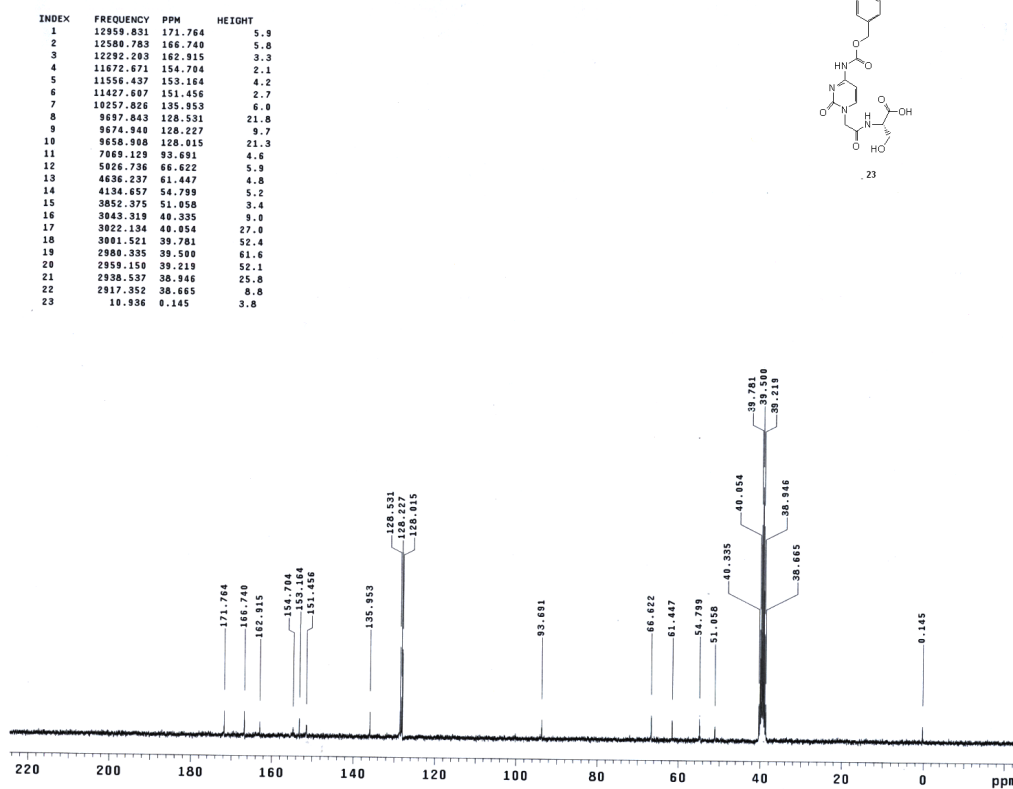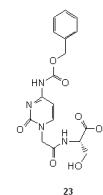

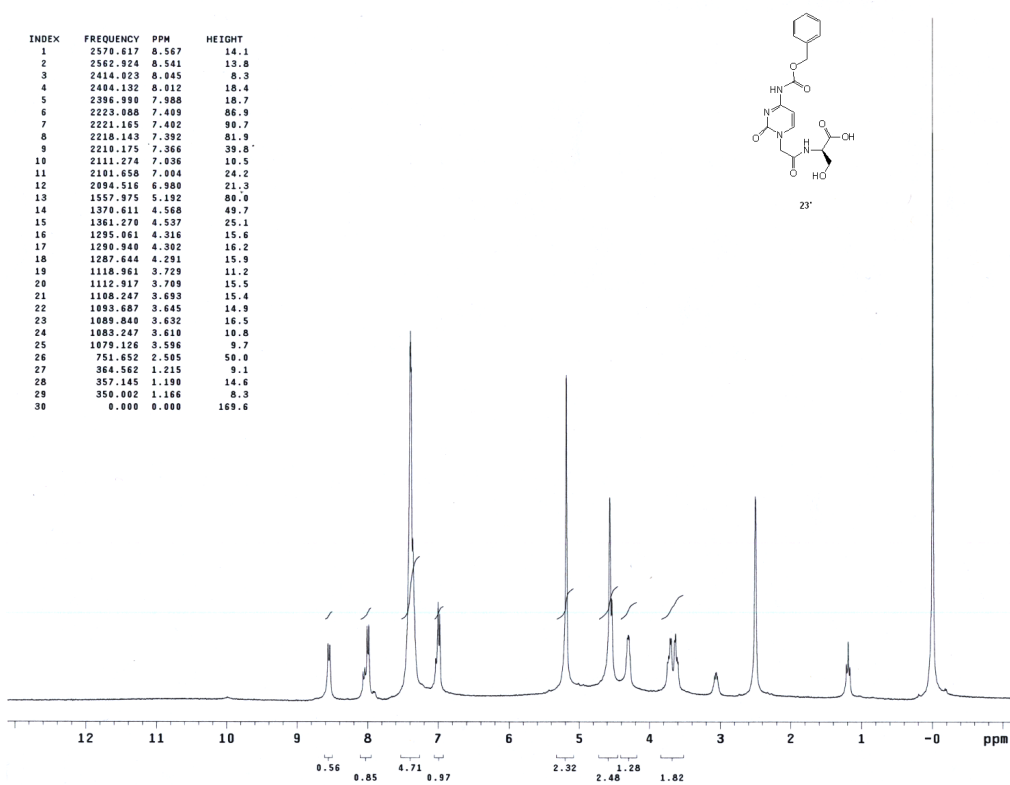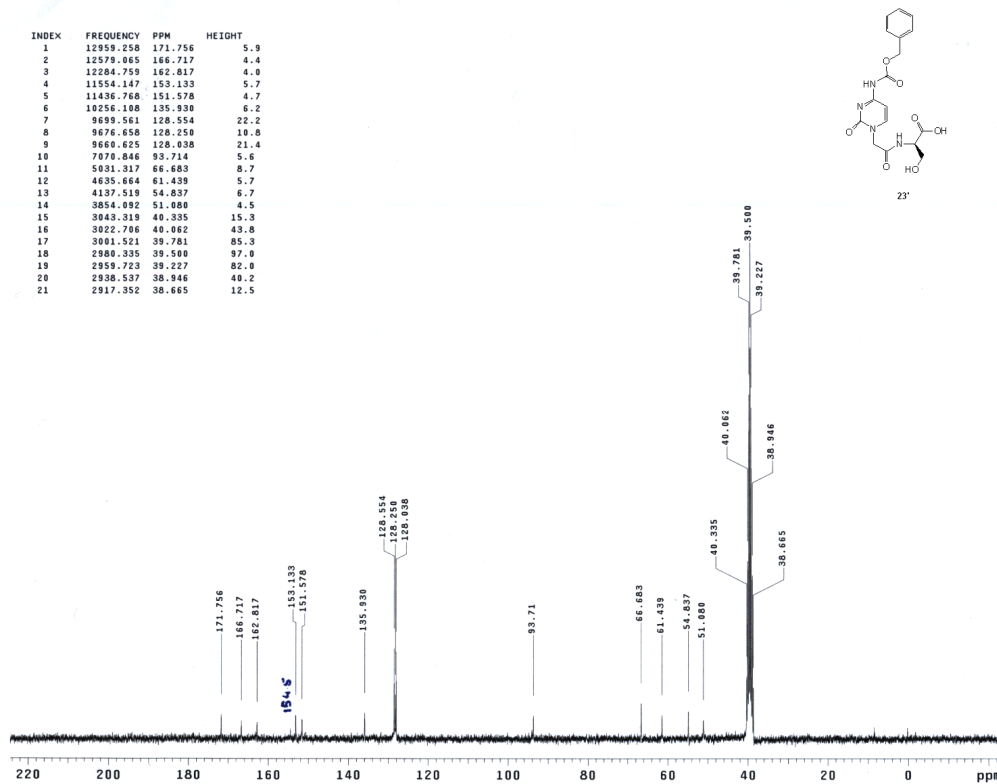

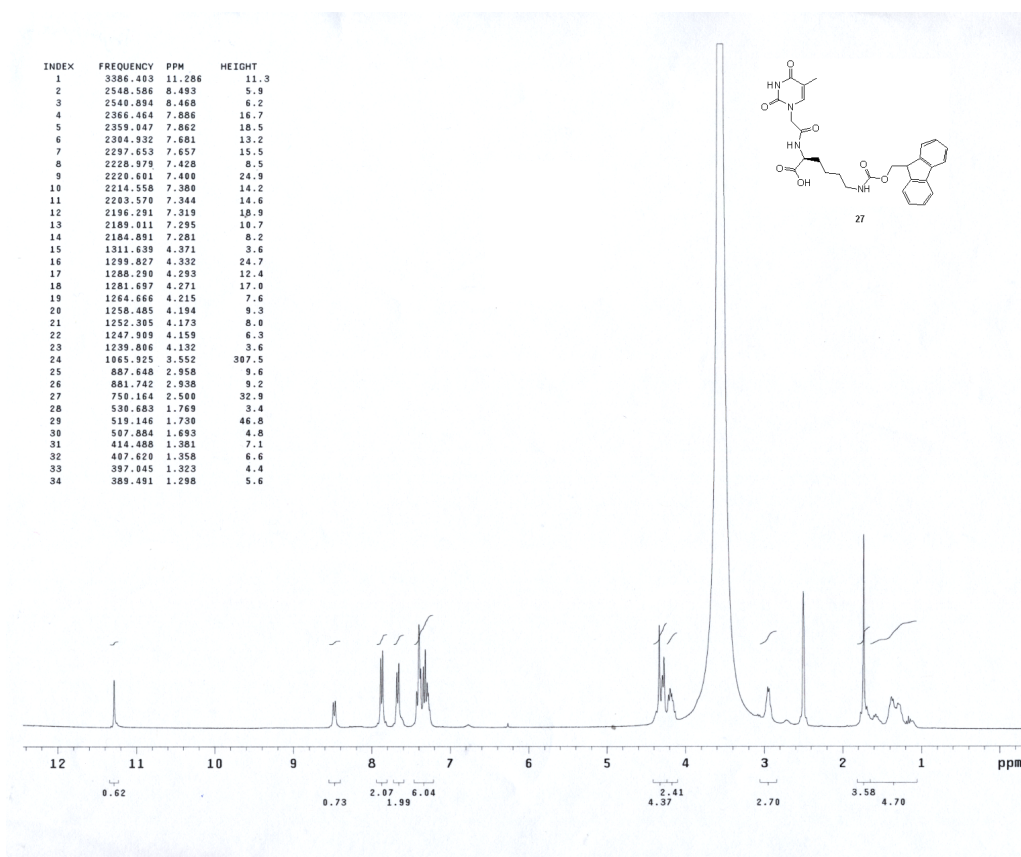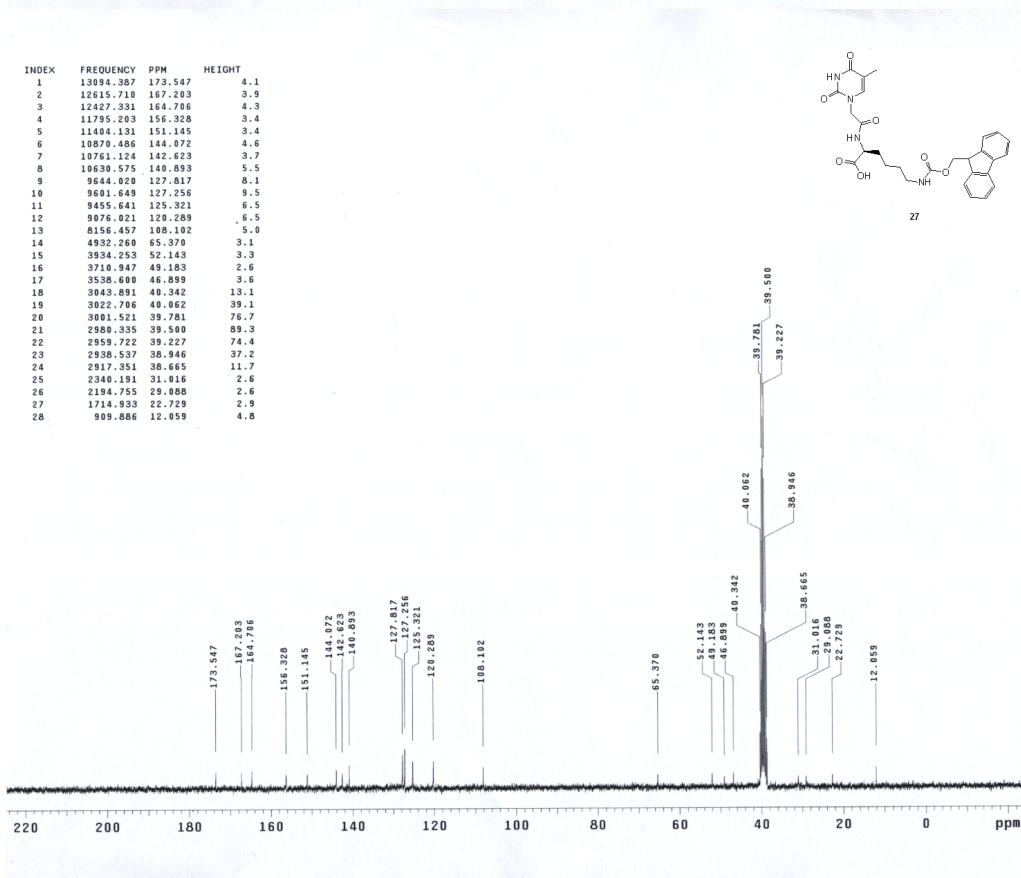





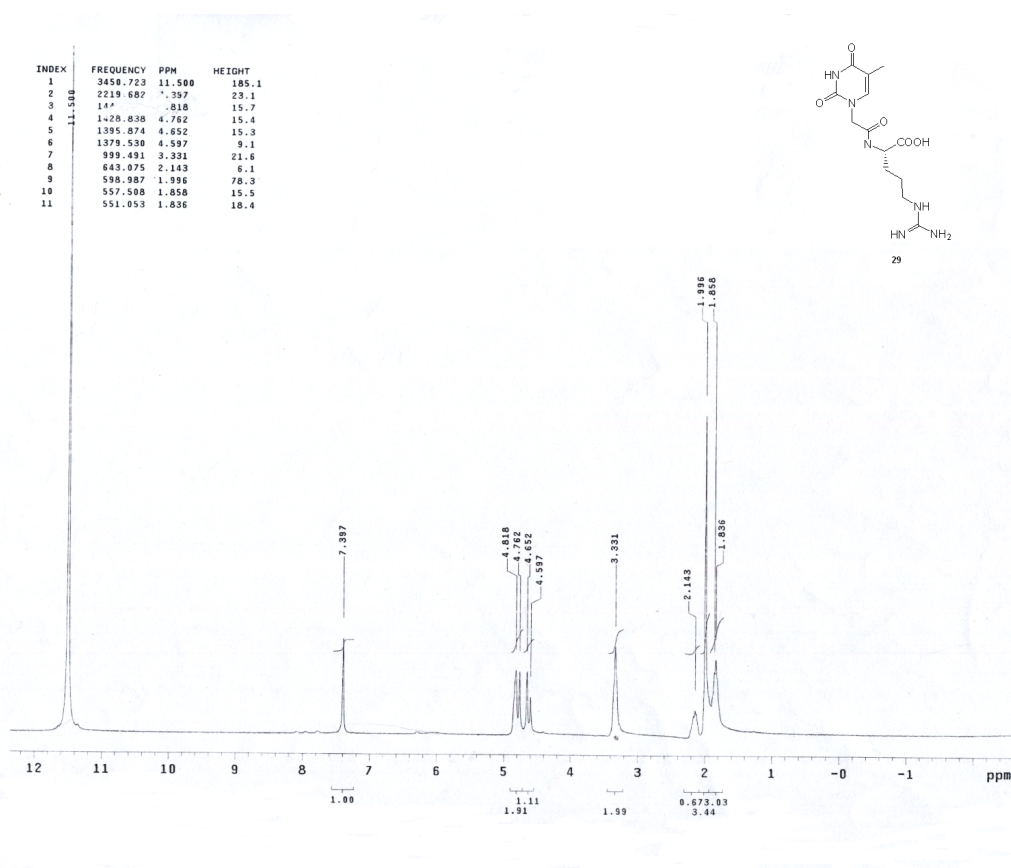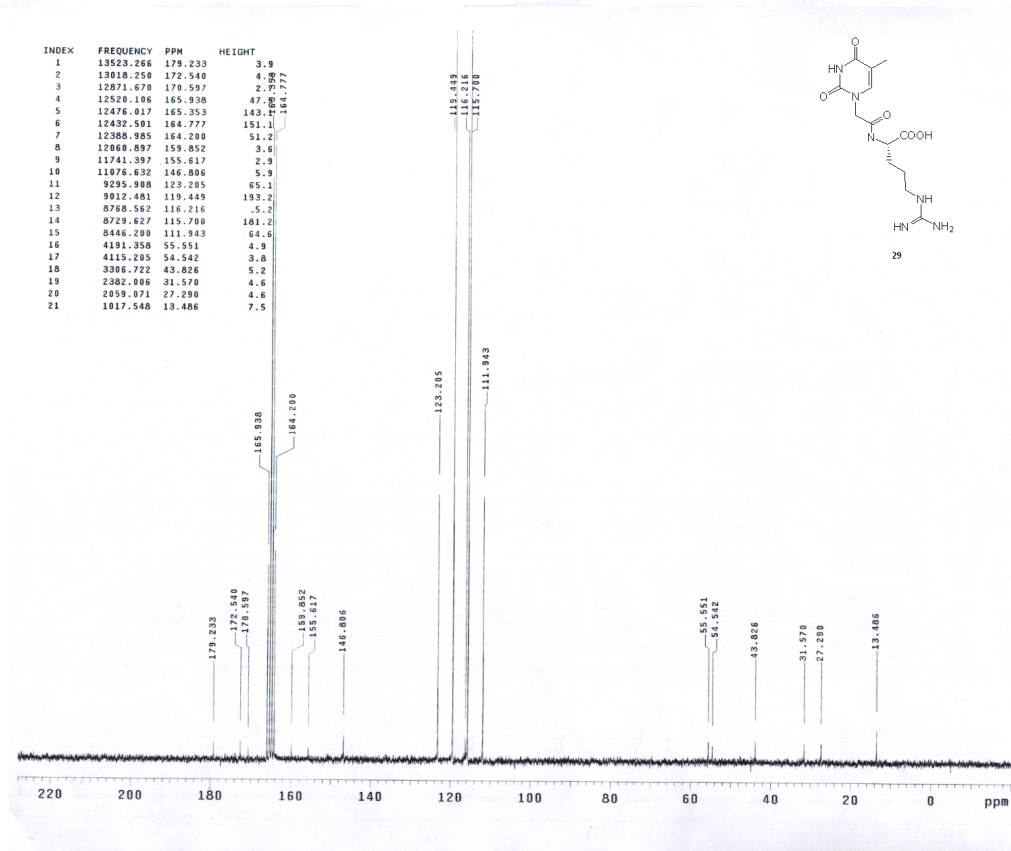

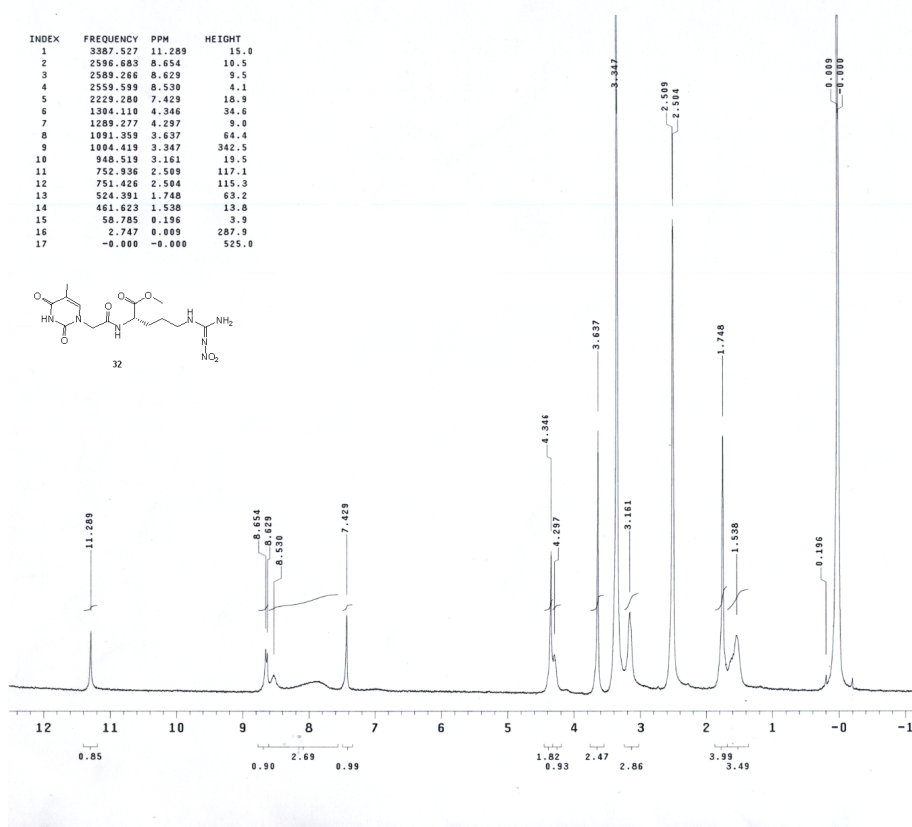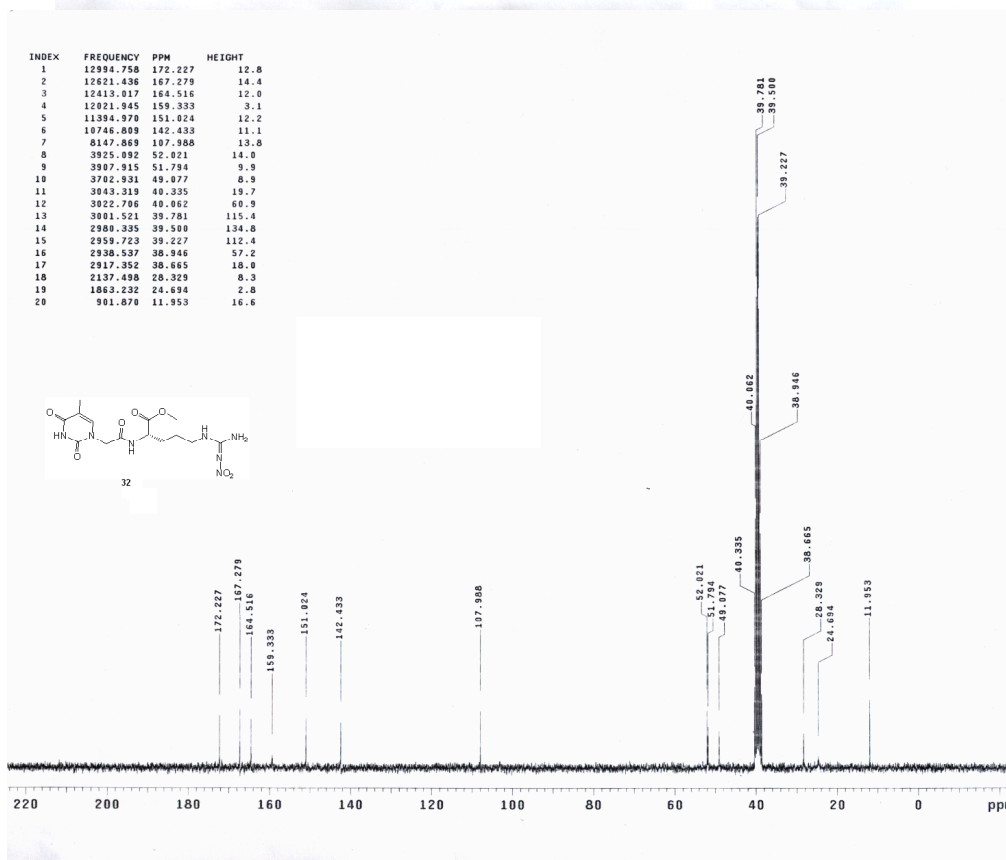

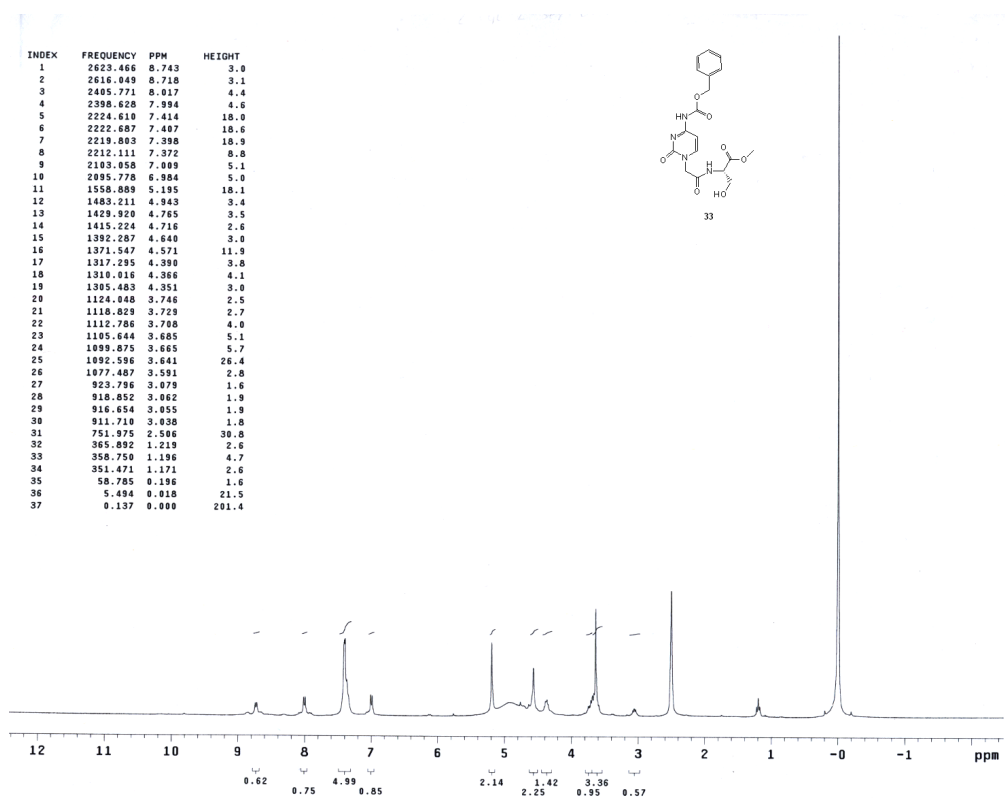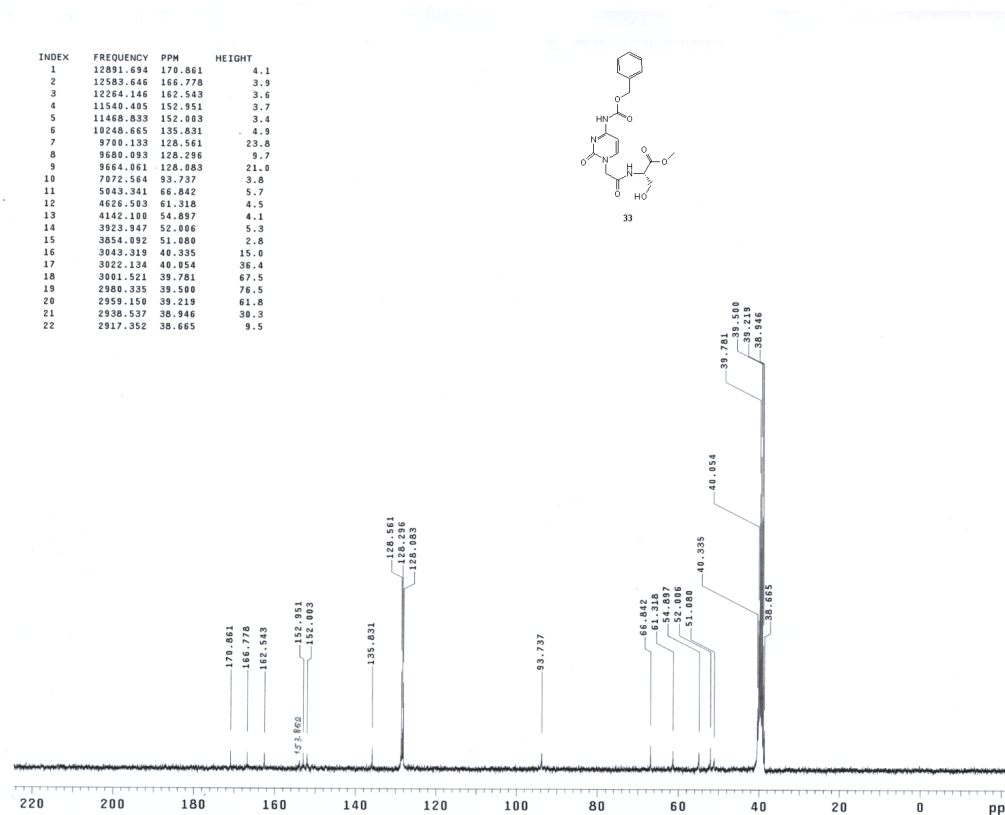

Supplement: b806141f.pdf [file b806141f.pdf]
